# Supplementary material for: Collagen Partition in Polymeric Aqueous Two-Phase Systems for Tissue Engineering
Source: PubMed Central journal article supplement (PMC6132203; doi:10.3389/fchem.2018.00379), 2018-09-04
Supplement: Presentation_1.pdf [file Presentation_1.pdf]

# Supplementary Information

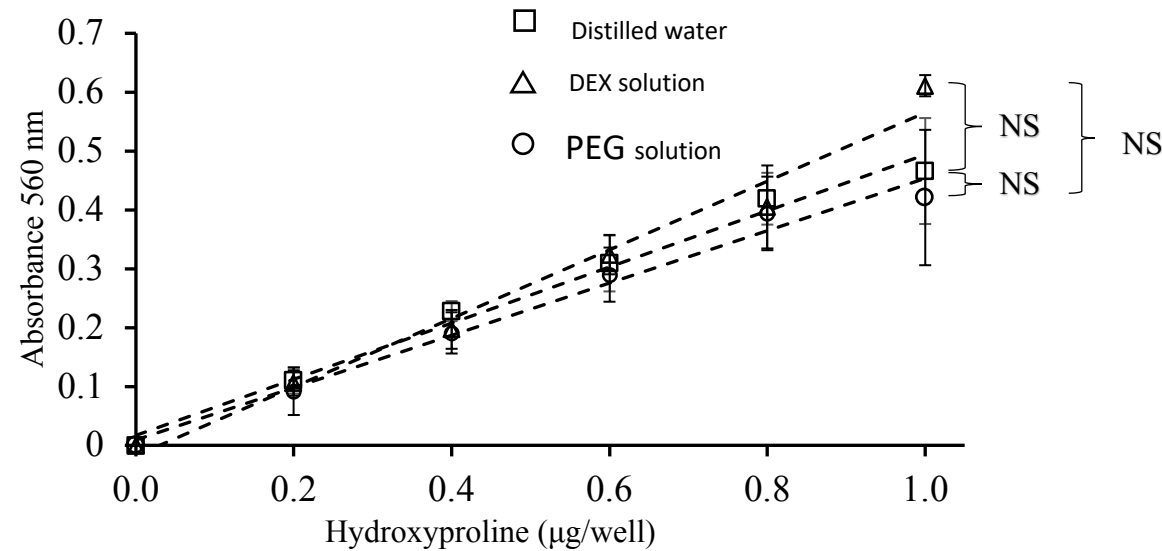

**Figure S1.** Standard curve for hydroxyproline standards prepared in distilled water, 10% (w/v) DEX500k solution, and 10% (w/v) PEG35k solution. All samples were hydrolyzed and absorbance was measured following the manufacturer's protocol. Statistical method: two-way ANOVA. NS: statistically nonsignificant.
